# Supplementary material
Source: publisher figshare collection journal article supplement (https://sage.figshare.com/ndownloader/files/12794348)
Supplement: Supplementary file 1 [file 12794348]

## APPENDIX B

**Table 4.** Outcome measures.

| Program Name   | Measuring Instrument                      | Outcome Variable                         | Time Effect Experiment Group | Time Effect Control Group | Program Effect  | Reference Study                                                         |
|----------------|-------------------------------------------|------------------------------------------|------------------------------|---------------------------|-----------------|-------------------------------------------------------------------------|
| 1.<br>VIPP-SD  | CBCL                                      | Child externalizing behavior: Overactive | 0.39                         | 0.23                      | 0.25            | Van Zeijl et al., 2006                                                  |
|                |                                           | Oppositional                             | 0.26                         | 0.14                      | 0.12            |                                                                         |
|                |                                           | Aggressive                               | 0.08                         | 0.11                      | 0.04            |                                                                         |
|                | 7 point Rating scales                     | Maternal sensitivity                     | 0.09                         | 0.08                      | 0.00            |                                                                         |
| 2.<br>VIPP-SD  | CBCL                                      | Child externalizing behavior             | 0.34                         | 0.15                      | 0.06            | Bakermans-Kranenburg, van IJzendoorn, Pijlman, Mesman, and Juffer, 2008 |
|                |                                           | Overactive                               | 0.36                         | 0.26                      | 0.20            |                                                                         |
|                |                                           | Oppositional                             | 0.33                         | 0.12                      | 0.03            |                                                                         |
|                |                                           | Aggressive                               | 0.13                         | 0.03                      | 0.01            |                                                                         |
|                | Observed task                             | Maternal positive discipline             | 0.26                         | 0.22                      | 0.50            |                                                                         |
|                | ICQ                                       | Child temperament                        | na                           | na                        | na <sup>a</sup> | Bakermans-Kranenburg, van IJzendoorn, Mesman, Alink, and Juffer, 2008   |
|                | DRD4- genotyping                          | DNA-samples                              | na                           | na                        | na <sup>a</sup> |                                                                         |
|                | Saliva samples                            | Cortisol production                      | na                           | na                        | na <sup>a</sup> |                                                                         |
| 3.<br>Pre-VIPP | Rating scales for sensitivity             | Maternal sensitivity                     | 0.14                         | 0.05                      | 0.49            | Juffer et al., 2005                                                     |
|                | SSP                                       | Maternal cooperation                     | 0.30                         | 0.11                      | 0.84            |                                                                         |
|                |                                           | Attachment (disorganization score)       | na                           | na                        | 0.62            |                                                                         |
| 4.<br>Pre-VIPP | Rating scales for sensitivity cooperation | Maternal sensitivity                     | 0.14                         | 0.07                      | 0.42            | Juffer et al., 1997                                                     |
|                | Infant Exploratory                        | Maternal cooperation                     | 0.34                         | 0.27                      | 0.87            |                                                                         |
|                | Competence                                | Infant exploration Quality               | 3.07                         | 1.98                      | 0.35            |                                                                         |

*(continued)*

*(continued)*

| Program Name             | Measuring Instrument                                                    | Outcome Variable                                                                                                                                                                        | Time Effect Experiment Group                     | Time Effect Control Group                        | Program Effect                                   | Reference Study                                                                                                                                                         |
|--------------------------|-------------------------------------------------------------------------|-----------------------------------------------------------------------------------------------------------------------------------------------------------------------------------------|--------------------------------------------------|--------------------------------------------------|--------------------------------------------------|-------------------------------------------------------------------------------------------------------------------------------------------------------------------------|
| 5.<br>VIPP and<br>VIPP-R | Attachment security score<br>Rating Scale for Sensitivity (observation) | Attachment<br>Maternal sensitivity                                                                                                                                                      | 0.10<br>0.46                                     | na<br>na                                         | VIPP 0.29<br>VIPP-R 0.08                         | Klein Velderman, Bakermans-Kranenburg, Juffer, and van IJzendoorn, 2006<br><br>Klein Velderman, Bakermans-Kranenburg, Juffer, van IJzendoorn, Mangelsdorf, et al., 2006 |
| 6.<br>VIPP-AUTI          | EAS<br><br><br><br><br>PEQ<br>PDH                                       | Maternal sensitivity<br>Maternal structuring<br>Maternal non-intrusiveness<br>Child-responsiveness<br>Child-involvement<br>Maternal self-efficacy<br>Daily hassles/strains and stresses | 0.12<br><br>0.36<br>0.22<br>0.17<br>0.52<br>0.04 | 0.13<br><br>0.22<br>0.13<br>0.07<br>0.12<br>0.07 | 0.01<br><br>0.13<br>0.04<br>0.02<br>0.45<br>0.13 | Poslawsky et al., 2014                                                                                                                                                  |
| 7.<br>VIPP-TM            | EAS<br><br>Discipline rating scales<br><br>Supportive presence scale    | Maternal sensitivity<br>Maternal non-intrusiveness<br>Maternal physical discipline<br>Laxness (parental discipline strategies)<br>Maternal supportive presence                          | 0.55<br>1.29<br>0.79<br>0.35<br>0.54             | 0.03<br>0.41<br>0.47<br>0.53<br>0.47             | 0.47<br>0.62<br>0.19<br>0.24<br>0.09             | Yagmur et al., 2014                                                                                                                                                     |

*(continued)*

*(continued)*

| Program Name | Measuring Instrument                             | Outcome Variable                            | Time Effect Experiment Group | Time Effect Control Group | Program Effect    | Reference Study                   |
|--------------|--------------------------------------------------|---------------------------------------------|------------------------------|---------------------------|-------------------|-----------------------------------|
| 8. VIPP      | Rating scale for sensitivity<br>Attachment Q-set | Maternal sensitivity                        | 1.54                         | 0.68                      | 0.79              | Kalinauskiene et al., 2009        |
|              |                                                  | Daily hassles (intensity)                   | 0.02                         | 0.28                      | 0.41              |                                   |
|              |                                                  | Daily hassles (frequency)                   | 0.78                         | 0.12                      | 0.80              |                                   |
|              |                                                  | Depression                                  | 0.36                         | 0.10                      | 0.28              |                                   |
|              |                                                  | Attachment security                         | na                           | na                        | 0.00 <sup>a</sup> |                                   |
|              |                                                  | Efficacy                                    | na                           | na                        | 0.31              |                                   |
| 9. VIPP-SD   | EAS                                              | Positive parenting (total score)            | 0.46                         | 0.18                      | 0.27              | Negrão et al., 2014               |
|              |                                                  |                                             | 0.27                         | 0.15                      | 0.27              |                                   |
|              |                                                  | Maternal sensitivity                        | 0.63                         | 0.42                      | 0.56              |                                   |
|              | EAS                                              | Non-intrusiveness                           | 0.68                         | 0.07                      | 0.51              |                                   |
|              |                                                  | Positive child behavior (total score)       |                              |                           |                   |                                   |
|              | FES                                              | Responsiveness                              | 0.72                         | 0.07                      | 0.52              |                                   |
|              |                                                  | Family relational functioning (total score) | 0.43                         | 0.50                      | 0.65              |                                   |
|              | Standardized observations                        | Cohesion                                    | na                           | na                        | na <sup>a</sup>   | Pereira et al., 2014              |
|              | DHQ                                              | Maternal harsh discipline                   | na                           | na                        | na                |                                   |
| 10. Pre-VIPP | Rating scale for sensitivity                     | Parenting stress                            |                              |                           |                   |                                   |
|              | SSP                                              | Maternal sensitivity                        | na                           | na                        | 0.91              | Bakermans-Kranenburg et al., 1998 |
| 11. PALS     | Targeted maternal observed behaviors, rated      | Attachment security                         | na                           | na                        | na <sup>a</sup>   |                                   |
|              |                                                  | Maternal sensitivity                        | na                           | na                        | 0.49              | Landry et al., 2006               |
|              |                                                  | Maternal positive affect                    |                              |                           | 0.83              |                                   |
|              |                                                  | Support of infant foci of attention         |                              |                           | 0.36              |                                   |
|              |                                                  |                                             |                              |                           | 0.93              |                                   |
|              |                                                  | Maternal responsiveness                     |                              |                           | 0.79              |                                   |
|              |                                                  | Language input                              |                              |                           | 0.71              |                                   |
|              |                                                  | Labeling of objects                         |                              |                           | 0.63              |                                   |

*(continued)*

*(continued)*

| Program Name                   | Measuring Instrument                            | Outcome Variable                  | Time Effect Experiment Group | Time Effect Control Group | Program Effect | Reference Study           |
|--------------------------------|-------------------------------------------------|-----------------------------------|------------------------------|---------------------------|----------------|---------------------------|
| 11. PALS<br><i>(continued)</i> |                                                 | Labeling of actions               |                              |                           | 0.39           | Landry et al., 2006       |
|                                |                                                 | Child's social cooperation        | na                           | na                        | na             |                           |
|                                |                                                 | Maternal harsh voice tone         | na                           | na                        | na             |                           |
|                                |                                                 | Maternal physical intrusiveness   | na                           | na                        | na             |                           |
| 12. VF                         | NCATS                                           | Parent Total Score                | 0.30                         | 0.34                      | 0.78           | Magill-Evans et al., 2007 |
|                                |                                                 | Parental sensitivity to cues      | 0.09                         | 0.57                      | 0.60           |                           |
|                                | PSOC                                            | Social-emotional growth fostering | 0.04                         | 0.31                      | 0.53           |                           |
|                                |                                                 | Cognitive growth fostering        | 0.50                         | 0.10                      | 0.70           |                           |
|                                |                                                 | Efficacy                          | 0.40                         | 0.47                      | 0.19           | Mendelsohn et al., 2007   |
|                                |                                                 | Satisfaction                      | 0.02                         | 0.16                      | 0.07           |                           |
| 13. VIP                        | MDI                                             | Cognitive development             | na                           | na                        | 0.26           |                           |
|                                | CBCL                                            | Total score                       | na                           | na                        | 0.31           |                           |
|                                |                                                 | Externalizing                     |                              |                           | 0.19           |                           |
|                                |                                                 | Internalizing                     |                              |                           | 0.09           |                           |
|                                | PLS-3                                           | Child language                    | na                           | na                        | 0.04           |                           |
|                                | PSI                                             | Parenting stress, total score     | na                           | na                        | 0.41           |                           |
|                                | Parent-Child Dysfunctional Interaction Subscale | Parent-child interaction          | na                           | na                        | 0.24           |                           |
|                                | Difficult Child Subscale                        |                                   |                              |                           |                |                           |
|                                | StimQ-T                                         | Child behavior                    | na                           | na                        | 0.22           |                           |
|                                | CES-D                                           | Parenting practices, total score  | na                           | na                        | 0.21           |                           |
|                                |                                                 | Maternal Depression,              | na                           | na                        | 0.17           |                           |

*(continued)*

| total score        |                                  |                                          |                              |                           |                 |                            |
|--------------------|----------------------------------|------------------------------------------|------------------------------|---------------------------|-----------------|----------------------------|
| <i>(continued)</i> |                                  |                                          |                              |                           |                 |                            |
| Program Name       | Measuring Instrument             | Outcome Variable                         | Time Effect Experiment Group | Time Effect Control Group | Program Effect  | Reference Study            |
| 14. VF             | SSP                              | Attachment security                      | na                           | na                        | na <sup>a</sup> | Moran et al., 2005         |
|                    | MBQS                             | Maternal sensitivity                     | na                           | na                        | na <sup>a</sup> |                            |
| 15. VF             | SSP                              | Attachment                               | na                           | na                        | na <sup>a</sup> | Brisch et al., 2003        |
| 16. VF             | Conflict Rating Scale            | Mealtime conflict-score                  | na                           | na                        | na <sup>a</sup> | Stein et al., 2006         |
| 17. IG             | Rating scale for sensitivity     | Maternal sensitivity                     | 1.29                         | 0.33                      | 0.62            | Robert-Tissot et al., 1996 |
|                    | Crittenden Experimental Index    | Maternal controlling behavior            |                              |                           | na              |                            |
|                    | KIA/KIDIES Profile (observation) | Sleeping                                 |                              |                           | na <sup>a</sup> |                            |
|                    |                                  | Cooperation                              |                              |                           | na              |                            |
|                    |                                  | Behavior                                 |                              |                           | na              |                            |
|                    | R-interview                      | Aggressiveness                           |                              |                           | na              |                            |
|                    |                                  | Self esteem                              | 0.16                         | 0.72                      | 0.11            |                            |
| 18. VF             | EPDS                             | Maternal depression                      | 1.69                         | 1.99                      | 0.33            | Bilszta et al., 2012       |
|                    | NPI                              | Maternal conceptions of infant behavior  | 0.23                         | 0.35                      | 0.31            |                            |
|                    | PSCS                             | Maternal social support                  | 0.45                         | 0.59                      | 0.07            |                            |
|                    | AAS                              | Attachment style                         | na                           | na                        | na              |                            |
| 19. VF             | EAS                              | Maternal sensitivity                     | 0.39                         | 0.44                      | 0.57            | Van Doesum et al., 2008    |
|                    | Parental sensitivity scale       | Maternal non-intrusiveness               | 0.12                         | 0.20                      | 0.24            |                            |
|                    |                                  | Maternal structuring                     | 0.59                         | 0.03                      | 0.39            |                            |
|                    |                                  | Maternal non-hostility                   | 0.00                         | 0.10                      | 0.10            |                            |
|                    |                                  | Child involvement                        | 0.04                         | 0.58                      | 0.51            |                            |
|                    |                                  | Child responsiveness                     | 0.26                         | 0.46                      | 0.68            |                            |
|                    | ITSEA                            | Infant social and emotional functioning: |                              |                           |                 |                            |
|                    |                                  | Externalizing                            |                              |                           | 0.09            |                            |

*(continued)*

| <i>(continued)</i> |                           | Internalizing                             |                              |                           | 0.30            |                             |
|--------------------|---------------------------|-------------------------------------------|------------------------------|---------------------------|-----------------|-----------------------------|
|                    |                           | Dysregulation                             |                              |                           | 0.08            |                             |
|                    |                           | Competence                                |                              |                           | 0.63            |                             |
|                    |                           | Depression                                | 0.56                         | 0.52                      | 0.17            |                             |
| Program Name       | Measuring Instrument      | Outcome Variable                          | Time Effect Experiment Group | Time Effect Control Group | Program Effect  | Reference Study             |
| 20. VF             | CBCL                      | Externalizing                             | na                           | na                        | 0.03            | Moss et al., 2011           |
|                    |                           | Internalizing                             |                              |                           | 0.12            |                             |
|                    | SSP                       | Child attachment                          | na                           | na                        | na <sup>a</sup> |                             |
|                    | MBQS                      | Parental sensitivity                      | na                           | na                        | 0.49            |                             |
| 21. VF             | NCATS                     | Total Score                               | 0.79                         | 0.06                      | 0.80            | Koniak-Griffin et al., 1992 |
|                    |                           | Mother's subscale                         | 0.79                         | 0.03                      | 1.04            |                             |
|                    |                           | Baby's subscale                           | 0.50                         | 0.06                      | 0.06            |                             |
|                    |                           | Cognitive growth-fostering subscale       | 1.22                         | 0.05                      | 0.98            |                             |
|                    |                           | Responsiveness to parent subscale         | 0.57                         | 0.16                      | 0.08            |                             |
|                    | SD-Self                   | Maternal attitudes                        | 0.36                         | 0.21                      | 0.24            |                             |
|                    | SD-Baby                   |                                           | 1.17                         | 0.04                      | 0.84            |                             |
| 22. VF             | CARE-Index                | Maternal sensitivity                      | 0.58                         | 0.08                      | 0.70            | Svanberg et al., 2010       |
|                    |                           | Child cooperation                         | 0.52                         | 0.20                      | 0.56            |                             |
|                    |                           | Child compulsive                          | 0.05                         | 0.29                      | 0.26            |                             |
|                    | EPDS                      | Depressive symptoms                       | na                           | na                        | na <sup>a</sup> |                             |
|                    | Self Esteem Questionnaire | Self-esteem                               | na                           | na                        | na <sup>a</sup> |                             |
|                    | GHQ-12                    | Psychological distress                    | na                           | na                        | na <sup>a</sup> |                             |
|                    | Parenting Stress Index    | Stress                                    | na                           | na                        | na <sup>a</sup> |                             |
|                    | Attachment                | Attachment                                | na                           | na                        | na <sup>a</sup> |                             |
| 23. VHT/ Orion     | Questionnaire:            | Parent-Child Positive Communication Index | 2.25                         | 0.14                      | 0.92            | Weiner et al., 1994         |
|                    |                           | Parent-Child Negative communication Index | 0.55                         | 0.16                      | 0.43            |                             |
|                    |                           | Child Well-Being Index                    | 0.66                         | 0.38                      | 0.39            |                             |

*(continued)*

(continued)

| Program Name  | Measuring Instrument                                           | Outcome Variable                                                         | Time Effect Experiment Group | Time Effect Control Group | Program Effect          | Reference Study     |
|---------------|----------------------------------------------------------------|--------------------------------------------------------------------------|------------------------------|---------------------------|-------------------------|---------------------|
| 24. VHT/VIG   | BABY-KIPPPI                                                    | Parents feelings about:<br>Volume of contact<br>Volume of crying/symptom | 5.14<br>0.60                 | 3.83<br>1.44              | 0.39<br>0.08            | Eliëns, 2005        |
| 25. VF        | FAARS                                                          | Medical consumption<br>Caregivers' relational schemas                    | na<br>na                     | na<br>na                  | 1.98<br>na <sup>a</sup> | Smith et al., 2013  |
| 26. Marte Meo | RACS<br>CBCL                                                   | Parent and child behavior<br>Total score                                 | na<br>0.63                   | na<br>0.01                | na<br>0.60              | Axberg et al., 2006 |
|               |                                                                | Externalizing symptoms                                                   | 0.52                         | 0.09                      | 0.28                    |                     |
|               |                                                                | Internalizing symptoms                                                   | 0.48                         | 0.16                      | 0.60                    |                     |
|               |                                                                | Child behavior symptoms                                                  | 0.54                         | 0.10                      | 0.82                    |                     |
|               | CPRS                                                           | Child behavior symptoms                                                  |                              |                           |                         |                     |
|               | TRF                                                            | Total score                                                              | 0.72                         | na                        | na <sup>a</sup>         |                     |
|               |                                                                | Externalizing                                                            | 0.86                         | na                        | na                      |                     |
|               |                                                                | Internalizing                                                            | 0.14                         | na                        | na                      |                     |
|               | CTRS                                                           | Child behavior problems in school                                        | 1.05                         | na                        | na                      |                     |
| 27. VF        | Scales of Infant Development and Ordinal Scales of Development | Development (mental and psychomotor)                                     | na                           | na                        | 0.72                    | Seifer et al., 1991 |
|               |                                                                | Interaction:                                                             |                              |                           |                         |                     |
|               |                                                                | Child disengage                                                          | 0.21                         | 0.91                      | 0.21                    |                     |
|               | Coding system for interactive dimensions                       | Maternal force                                                           | 0.27                         | 0.18                      | 0.14                    |                     |
|               |                                                                | Child fussy                                                              | 0.69                         | 0.07                      | 0.68                    |                     |
|               |                                                                | Maternal responsive                                                      | 0.75                         | 0.28                      | 0.58                    |                     |
|               |                                                                | Child responsive                                                         | 0.30                         | 0.08                      | 0.24                    |                     |
|               |                                                                | Maternal stimulating                                                     | 0.77                         | 0.36                      | 0.72                    |                     |
|               |                                                                | Child spontaneous                                                        | 1.05                         | 0.90                      | 0.30                    |                     |

(continued)

*(continued)*

| Program Name    | Measuring Instrument | Outcome Variable                                      | Time Effect Experiment Group | Time Effect Control Group | Program Effect | Reference Study     |
|-----------------|----------------------|-------------------------------------------------------|------------------------------|---------------------------|----------------|---------------------|
| 28. IG modified | AMBIANCE             | Total Score                                           | 1.13                         | 0.11                      | 1.31           | Benoit et al., 2001 |
|                 |                      | Level of disrupted communication                      | 1.22                         | 0.37                      | 1.17           |                     |
| 29. RFI         | MBRS                 | Maternal responsiveness                               | 0.66                         | 1.45                      | 2.33           | Kim & Mahoney, 2005 |
|                 |                      | Maternal affect                                       | 1.40                         | 1.18                      | 2.63           |                     |
|                 | CBRS                 | Child persistence                                     | 0.18                         | 0.40                      | 0.60           |                     |
|                 |                      | Child cooperation                                     | 0.12                         | 0.37                      | 0.72           |                     |
|                 |                      | Child affect                                          | 1.64                         | 0.22                      | 1.00           |                     |
|                 |                      | Child joint attention                                 | 0.73                         | 0.76                      | 0.08           |                     |
|                 |                      | Child initiation                                      | 0.99                         | 0.79                      | 0.31           |                     |
|                 | PSI                  | Child temperament                                     | 0.19                         | 0.33                      | 1.14           |                     |
|                 |                      | Parenting stress related to parent-child relationship | 0.66                         | 0.23                      | 0.05           |                     |

*Note.* Numerical data in the publications have been used or recalculated when possible; outcome data is based on pre-test and post-test; na = not available, e.g. numbers were missing or calculating not possible based on information in the publication; <sup>a</sup> = when numerical data was not available, the study is commented on below; as well as abbreviations:

- Study no. 2: The intervention proved to be effective in decreasing daily cortisol production in children having a specific gene set. Maternal insensitivity was associated with externalizing behaviors, but only in presence of the specific gene (Bakermans-Kranenburg, van IJzendoorn, Mesman, Alink, and Juffer, 2008).
- Study no. 8: Concerning attachment security there were no significant difference between the two groups at post-test, but the correlation between parental sensitivity and infant attachment security was strong in the control group as well as in the intervention group (Kalinauskiene et al., 2009).
- Study no. 9: Harsh discipline decreased in the intervention group (not in the control group), only under conditions of higher parenting stress (Pereira et al., 2014).
- Study no. 10: No significant higher percentage of securely attached infants in the intervention group than in the control group (Bakermans-Kranenburg et al., 1998).
- Study no. 14: Mothers participating in the intervention program were more likely than mothers in the comparison group to be in secure attachment relationships with their infants at 12 months. The overall effect was reported to be modest. The data indicated that the intervention was effective in promoting a secure infant-mother attachment relationship only when the mother was not classified as



unresolved/disoriented on the AAI. The result indicated that the intervention had a positive impact on the quality of mother-infant interactions (Moran et al., 2005).

- Study no. 15: The group differences in the result did not reach a statistical significance between intervention group and a control group concerning attachment representation, but showed a tendency (the control group had a high percentage of children with a secure attachment and the experimental group had a high percentage of infants with a dismissing classification of attachment representations) (Brisch et al., 2003).
- Study no. 16: The experimental group exhibited significantly less mealtime conflicts and greater infant autonomy during mealtimes than the control group (Stein et al., 2006).
- Study no. 17: The results showed that the infants were more cooperative, less compulsive-compliant, less difficult, less unresponsive, and displayed a more positive affect during interaction at post-test (Robert-Tissot et al., 1996).
- Study no. 20: The study presented significant results regarding child attachment security, as well as a reduction in child disorganization (Moss et al., 2011).
- Study no. 22: There were no significant differences between intervention and control group when it comes to maternal depressive symptoms, self-esteem, parenting stress and psychological distress. There was a trend reported towards more secure attachment in the intervention group (Svanberg et al., 2010).
- Study no. 25: The study presents a path-analysis and conclusion is drawn that provides additional (even if weak) support that VF improves outcomes over and above what other interventions provides (Smith et al., 2013).
- Study no. 26: On the TRF a significant reduction was found concerning externalizing behaviour, whereas on the TRF internalizing syndrome scale change was non-significant (Axberg et al., 2006).
- Study no. 28: There were differences between the intervention group and control group concerning decrease in Atypical parental behaviours and decrease in level of Disrupted communication, corresponding to medium and large effect sizes when presented in  $w^2$  (Benoit et al., 2001).

Explanations of abbreviations, for references we refer to the individual publications:

|       |                                         |
|-------|-----------------------------------------|
| CBCL  | Child Behaviour Checklist               |
| ICQ   | Infant Characteristics Questionnaire    |
| SSP   | Strange Situation Procedure             |
| EAS   | Emotional Availability Scales           |
| PEQ   | Parent Efficacy Questionnaire           |
| PDH   | Parenting Daily Hassles                 |
| FES   | Family Environment Scale                |
| DHQ   | Daily Hassles Questionnaire             |
| NCATS | Nursing Child Assessment Teaching Scale |
| MDI   | Mental development Index                |

*(continued)*

*(continued)*

|              |                                                                         |
|--------------|-------------------------------------------------------------------------|
| PLS-3        | Preschool Language Scale                                                |
| PSI          | Parenting Stress Index                                                  |
| StimQ-T      | StimQ-Toddler                                                           |
| CES-D        | Centre for Epidemiologic Studies-Depression Scale                       |
| MBQS         | The Maternal Behaviour Q-set                                            |
| R-Interview  | Representation Interview                                                |
| EPDS         | Edinburgh Postnatal Depression Scale                                    |
| PSCS         | Parenting Sense of Competence Scale                                     |
| AAS          | Adult Attachment Scale                                                  |
| ITSEA        | The Infant Toddler Social and Emotional Assessment                      |
| BDI          | Beck Depression Inventory                                               |
| SD-Self/Baby | Myself as Mother and My Baby                                            |
| GHQ-12       | General Health Questionnaire                                            |
| FAARS        | Family Affective Attitude Rating Scale                                  |
| CPRS         | Connors' Parents Rating Scale                                           |
| CTRS         | Connors' Teacher Rating Scale                                           |
| TRF          | Teachers Report Form                                                    |
| AMBIANCE     | Atypical Maternal Behavior Instrument for Assessment and Classification |
| MBRS         | Maternal Behavior Rating Scale                                          |
| PSOC         | Parenting Sense of Competence                                           |
| NPI          | Neonatal Perception Inventory                                           |
